# Supplementary material
Source: publisher figshare collection journal article supplement (https://frontiersin.figshare.com/ndownloader/files/31026001)
Supplement: Supplementary file [file 31026001]

## Supplementary Table 1

### (A) Sequences of primers for DNA methylation analysis

| Gene           | Accession No. | Sequence (5' to 3')                                    |
|----------------|---------------|--------------------------------------------------------|
| <i>Cyp4f39</i> | NC_000083     | F: GTCCAGCGACTGTGGCCTTA<br>R: ACACCAGAGCGCGCTCAGGA     |
| <i>Hs6st3</i>  | NC_000080     | F: GAGCCTCATGCAGCTCCTGT<br>R: GCTCCTCTTGTACCTGGACG     |
| <i>Synj2</i>   | NC_000083     | F: CTTGTCCGCGGGAGTACTGGGT<br>R: CAGTTGGCTCTCCAAGAACAGA |

### (B) Sequences of primers for qRT-PCR

| Gene          | Accession No. | Sequence (5' to 3')                                   |
|---------------|---------------|-------------------------------------------------------|
| <i>Dcc</i>    | NM_007831     | F: TACCAATGCGAGGCATCCTT<br>R: GTATCTCCCATGAAGGCTGT    |
| <i>Traf2</i>  | NM_009422     | F: ACGGAGTGTCTGTCATGTAA<br>R: GCATGCTCTAACATGGTCCTGA  |
| <i>Sox2</i>   | NM_011443     | F: GGAAAGGGTTCTTGCTGGGT<br>R: ACGAAAACGGTCTTGCCAGT    |
| <i>Dnmt1</i>  | NM_010066     | F: TCCAGAGCCCTATCGCATCG<br>R: CGTTGTAGGACCTGTGGGTAT   |
| <i>Dnmt3a</i> | NM_007872     | F: CTGCAAGAGTGTCTGGAGCA<br>R: TCAGTGCACCACAGGATGTC    |
| <i>Dnmt3b</i> | NM_010068     | F: AGTCGAAGACGCACAACCAATG<br>R: GTGACTTCAGAAGCCATCCGT |
| <i>Tet1</i>   | NM_001253857  | F: TGCTGGAGACTGTCGACTTG<br>R: CGAATCAACGTACACACCACG   |
| <i>Tet2</i>   | NM_001040400  | F: GGCTGCCCTGTAGGATTTGT<br>R: AATGAATCCAGCAGCACCGT    |
| <i>Tet3</i>   | NM_183138     | F: AATGATGACCGGACCTGTGC<br>R: GGAACCTTCGTGGCGTCTTG    |
| <i>Gapdh</i>  | NM_008084     | F: TGTGCAGTGCCAGCCTCGTC<br>R: GGATGCATTGCTGACAATCT    |
